# Supplementary material for: DCA-Transparency
Source: Atypon-hosted journal article supplement (doi:10.1026/0932-4089/a000360), 2021-06-08
Supplement: 0932-4089_a000360_esm1.pdf [file 0932-4089_a000360_esm1.pdf]

## Electronic Supplements

**Table E1.** Correlations of extended DCA-transparency and KomminO scales

*Note.* Cronbach's alpha is shown on the diagonal; \*  $p < .05$ , \*\*  $p < .01$ ; Trust scale of Gillespie (2003); KomminO scale of Sperka (1997); sample

| Variables                 | Mean | SD   | 1       | 2       | 3       | 4       | 5       | 6       | 7       | 8       | 9       | 10      | 11      | 12      | 13     | 14   | 15   |
|---------------------------|------|------|---------|---------|---------|---------|---------|---------|---------|---------|---------|---------|---------|---------|--------|------|------|
| 1 Overall Transparency    | 3.72 | 0.62 | .926    |         |         |         |         |         |         |         |         |         |         |         |        |      |      |
| 2 Disclosure              | 3.43 | 0.98 | .816**  | .915    |         |         |         |         |         |         |         |         |         |         |        |      |      |
| 3 Clarity                 | 4.01 | 0.77 | .795**  | .596**  | .890    |         |         |         |         |         |         |         |         |         |        |      |      |
| 4 Accuracy                | 4.07 | 0.68 | .747**  | .532**  | .507**  | .881    |         |         |         |         |         |         |         |         |        |      |      |
| 5 Timeliness              | 3.49 | 0.92 | .801**  | .564**  | .542**  | .527**  | .847    |         |         |         |         |         |         |         |        |      |      |
| 6 Relevance               | 3.60 | 0.78 | .585**  | .276**  | .351**  | .314**  | .314**  | .838    |         |         |         |         |         |         |        |      |      |
| 7 Trust                   | 3.55 | 0.80 | .604**  | .550**  | .392**  | .445**  | .494**  | .359**  | .897    |         |         |         |         |         |        |      |      |
| 8 Overall KomminO         | 3.02 | 0.36 | .572**  | .514**  | .473**  | .405**  | .376**  | .372*   | .612**  | .871    |         |         |         |         |        |      |      |
| 9 KomminO – Comm. Quality | 3.43 | 0.79 | .705**  | .678**  | .582**  | .420**  | .552**  | .370**  | .565**  | .778**  | .914    |         |         |         |        |      |      |
| 10 KomminO – Trust        | 3.53 | 1.05 | .521**  | .476**  | .483**  | .387**  | .296**  | .316**  | .675**  | .767**  | .650**  | .843    |         |         |        |      |      |
| 11 KomminO – Feedback     | 2.94 | 0.96 | .351**  | .383**  | .278**  | .139    | .287**  | .184*   | .462**  | .676**  | .567**  | .416**  | .800    |         |        |      |      |
| 12 KomminO – Importance   | 3.76 | 0.86 | .343**  | .328**  | .240**  | .297**  | .200*   | .222**  | .377**  | .525**  | .308**  | .312**  | .266**  | .731    |        |      |      |
| 13 KomminO – Overload     | 2.23 | 0.96 | -.056   | .033    | -.099   | -.098   | .045    | -.151   | -.056   | -.496** | -.169*  | -.159   | -.147   | -.121   | .807   |      |      |
| 14 KomminO – Conclusion   | 3.00 | 0.48 | -.055   | -.035   | -.177   | .006    | -.005   | -.001   | .080    | .035*   | -.103   | -.029   | -.017   | -.072   | .024   | .791 |      |
| 15 KomminO – Withholding  | 2.27 | 0.93 | -.415** | -.329** | -.354** | -.317** | -.284** | -.281** | -.358** | -.787   | -.571** | -.555** | -.383** | -.251** | .393** | .117 | .729 |

size  $N = 114$ .

**Table E2.** Comparison of correlations of related and unrelated scales

| Variables            | Dataset Study 3          |                          |                 | Separate Dataset<br>KomminO | Dataset Study 1 |                        |
|----------------------|--------------------------|--------------------------|-----------------|-----------------------------|-----------------|------------------------|
|                      | Communication<br>Quality | Informational<br>Justice | Trustworthiness |                             | Well-Being      | Need-for-<br>Cognition |
| Overall Transparency | .650**                   | .861**                   | .643**          | .572**                      | .164**          | .067                   |
| Disclosure           | .616**                   | .767**                   | .577**          | .514**                      | .170**          | .124*                  |
| Clarity              | .604**                   | .746**                   | .560**          | .473**                      | .084            | -.029                  |
| Accuracy             | .557**                   | .750**                   | .553**          | .405**                      | .041            | -0.13                  |
| Timeliness           | .538**                   | .744**                   | .537**          | .376**                      | .195**          | .040                   |
| Relevance            | .453**                   | .629**                   | .509**          | .372**                      | .119*           | .122*                  |

*Note.* \* $p < .05$ , \*\* $p < .01$ . Sample size of dataset of Study 3  $N = 376$ ; sample size of separate dataset  $N = 114$ ; sample size of dataset of Study 1  $N = 322$ . All other correlations are significant ( $p < .05$ ). Communication Quality scale of Mohr et al. (2014); Informational Justice scale of Maier et al. (2007); KomminO scale of Sperka (1997); Well-Being scale of Brähler et al. (2007); Need-for-Cognition scale of Beißert et al. (2014).

**Table E3.** Comparison of incremental validity of OT over related scales via stepwise regression

| Variable                                                      | Dataset Study 3   |                   |                    |                   |                   |                   |                         |                   | Separate Dataset  |                   |
|---------------------------------------------------------------|-------------------|-------------------|--------------------|-------------------|-------------------|-------------------|-------------------------|-------------------|-------------------|-------------------|
|                                                               | Beta<br>(se)      |                   | Beta<br>(se)       |                   | Beta<br>(se)      |                   | Beta<br>(se)            |                   | Beta<br>(se)      |                   |
| <i>Effects</i>                                                | <i>Ability</i>    |                   | <i>Benevolence</i> |                   | <i>Integrity</i>  |                   | <i>Job Satisfaction</i> |                   | <i>Trust</i>      |                   |
| Informational Justice<br>(Communication Quality) <sup>a</sup> | 0.59***<br>(0.04) | 0.22**<br>(0.08)  | 0.70***<br>(0.04)  | 0.49***<br>(0.09) | 0.71***<br>(0.04) | 0.40***<br>(0.09) | 0.44***<br>(0.05)       | 0.13<br>(0.10)    | 0.57***<br>(0.08) | 0.28**<br>(0.10)  |
| Overall Transparency                                          |                   | 0.48***<br>(0.09) |                    | 0.28***<br>(0.10) | 0.17**<br>(0.05)  | 0.42**<br>(0.09)  |                         | 0.41***<br>(0.12) |                   | 0.52***<br>(0.13) |
| Adj. $R^2$                                                    | .31               | .35               | .35                | .36               | .39               | .42               | .16                     | .19               | .31               | .39               |
| $\Delta R^2$                                                  |                   | .04**             |                    | .01**             |                   | .03***            |                         | .03*              |                   | .08***            |

Note. \* $p < .05$ , \*\* $p < .01$ , \*\*\* $p < .001$ . Sample size of dataset of Study 3  $N = 376$ ; sample size of separate dataset  $N = 114$ . <sup>a</sup> = Communication Quality as the Communication Quality Subscale of the KomminO (Sperka, 1997), only for Trust as the dependent variable.

## Sources

- Beißert, H., Köhler, M., Rempel, M., & Beierlein, C. (2014). Eine Deutschsprachige Kurzsкала zur Messung des Konstrukts Need for Cognition: Die Need for Cognition Kurzsкала (NFC-K).
- Brähler, E., Mühlhan, H., Albani, C., & Schmidt, S. (2007). Teststatistische Prüfung und Normierung der deutschen Versionen des EUROHIS-QOL Lebensqualität-Index und des WHO-5 Wohlbefindens-Index. *Diagnostica*, 53(2), 83-96.
- Gillespie, N. (2003), Measuring trust in work relationships: The Behavioural Trust Inventory. Paper presented at the Academy of Management Conference, Seattle.
- Maier, G. W., Streicher, B., Jonas, E., & Woschée, R. (2007). Gerechtigkeitseinschätzungen in Organisationen: Die Validität einer deutschsprachigen Fassung des Fragebogens von Colquitt (2001). *Diagnostica*, 53(2), 1–38. <https://doi.org/10.1026/0012-1924.53.2.97>
- Mohr, G., Wolfram, H.-J., Schyns, B., Paul, T., & Günster, A. C. (2014). Kommunikationsqualität Führungskräfte und MitarbeiterInnen. In *Zusammenstellung sozialwissenschaftlicher Items und Skalen*. <https://doi.org/10.6102/zis27>
- Sperka, M. (1997). Zur Entwicklung eines "Fragebogens zur Erfassung der Kommunikation in Organisationen" (KomminO). *Zeitschrift für Arbeits- und Organisationspsychologie*, 41, 182-190.
